# Supplementary material
Source: PubMed Central journal article supplement (PMC5519354)

Supplementary Table 1: Primer Sequences used for RT-QPCR

|        | Forward primer sequences | Reverse primer sequences |
|--------|--------------------------|--------------------------|
| mFXR   | GCTTGATGTGCTACAAAAGCTG   | CGTGGTGATGGTTGAATGTCC    |
| mTGR5  | CCTGGCAAGCCTCATCGTC      | AGCAGCCCGGCTAGTAGTAG     |
| mFn    | TTCAAGTGTGATCCCCATGAAG   | CAGGTCTACGGCAGTTGTCA     |
| mFSP-1 | TCCACAAATACTCAGGCAAAGAG  | GCAGCTCCCTGGTCAGTAG      |
| mTNFa  | CAGGCGGTGCCTATGTCTC      | CGATCACCCCGAAGTTCAGTAG   |
| mMCP1  | TTAAAAACCTGGATCGGAACCAA  | GCATTAGCTTCAGATTTACGGGT  |
| mIL1b  | GAAATGCCACCTTTTGACAGTG   | TGGATGCTCTCATCAGGACAG    |
| mTGfb  | CCACCTGCAAGACCATCGAC     | CTGGCGAGCCTTAGTTTGGAC    |
| mPGC1a | TATGGAGTGACATAGAGTGTGCT  | CCACTTCAATCCACCCAGAAAG   |
| mSirt1 | GCTGACGACTTCGACGACG      | TCGGTCAACAGGAGGTTGTCT    |
| mSirt3 | GAGCGGCCTCTACAGCAAC      | GGAAGTAGTGAGTGACATTGGG   |
| mERRa  | GGGAGCATCGAGTACAGC       | AGACGCACACCCTCCTTGA      |
| mNrf1  | AGCACGGAGTGACCCAAAC      | TGTACGTGGCTACATGGACCT    |

# Supplemental Figure S1

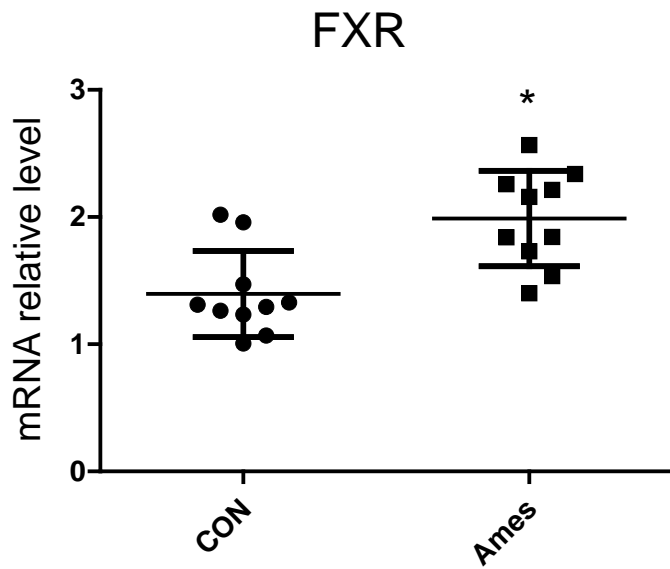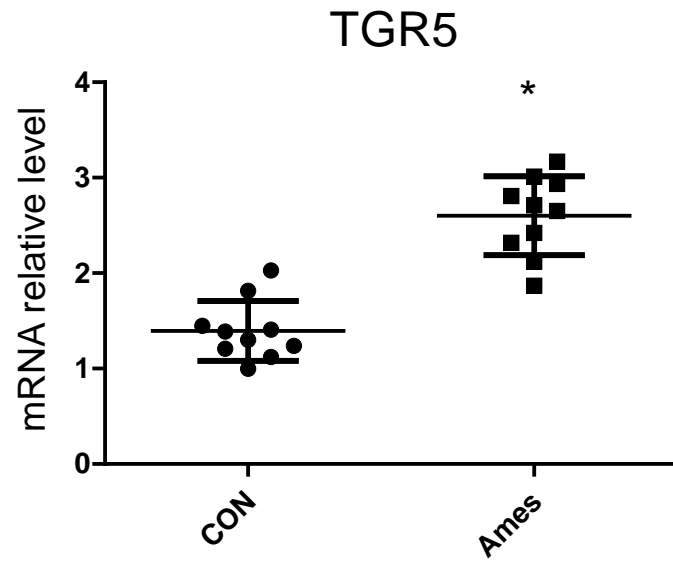

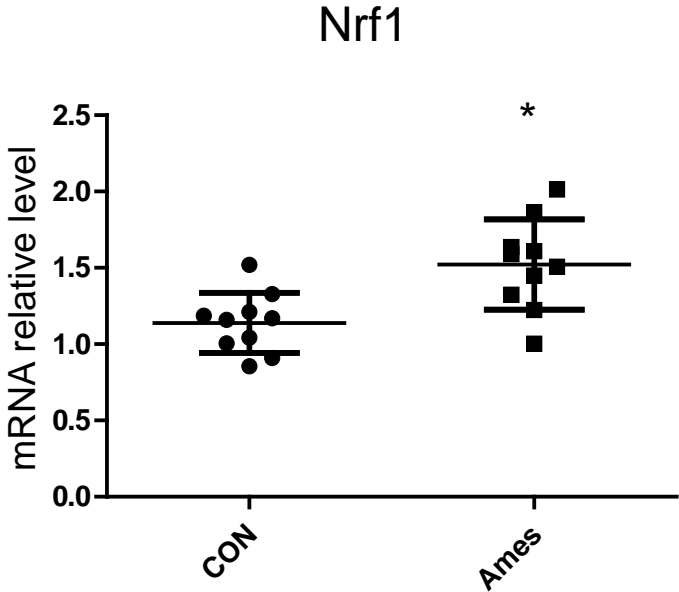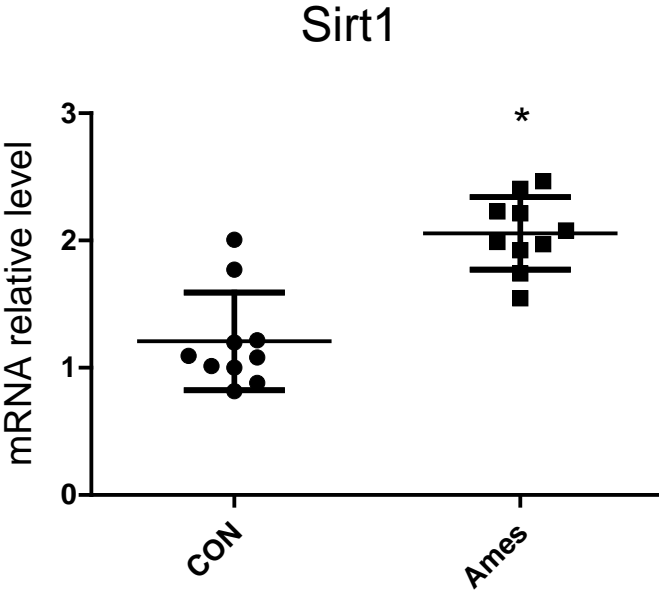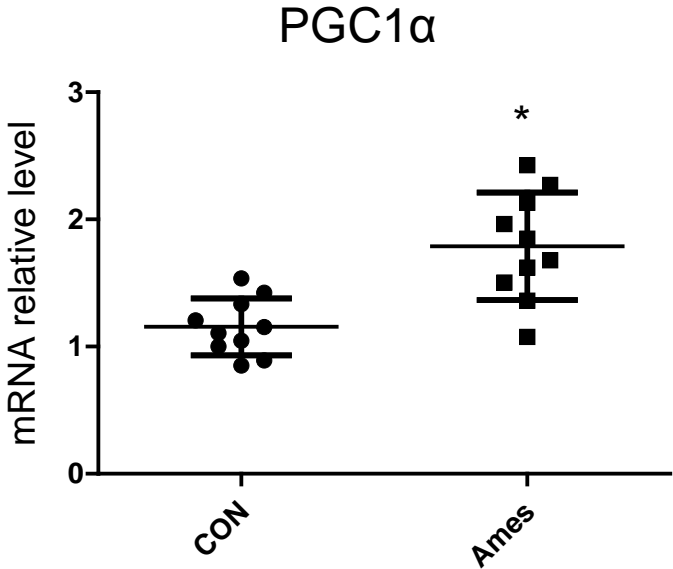

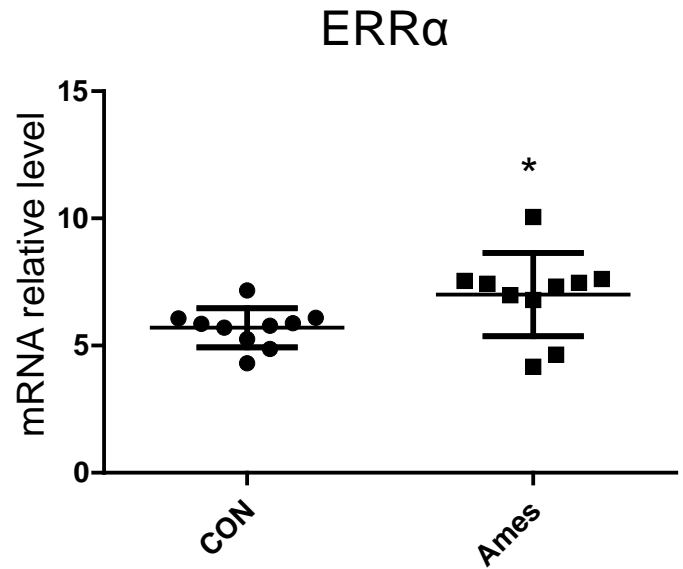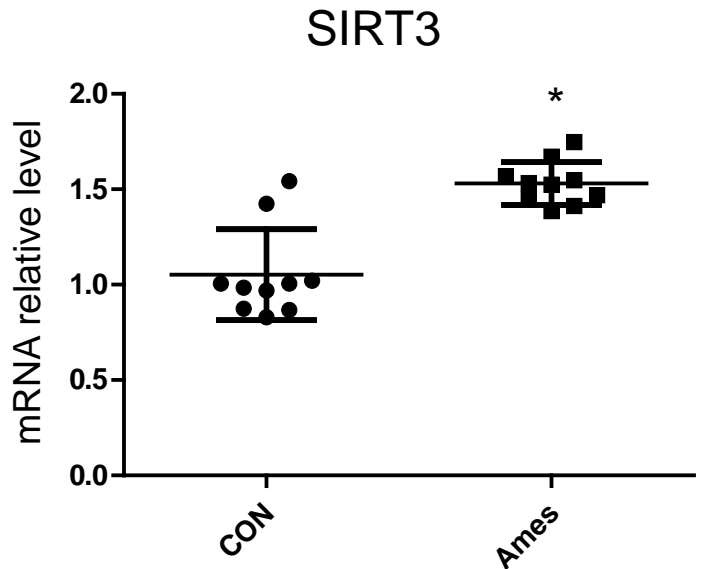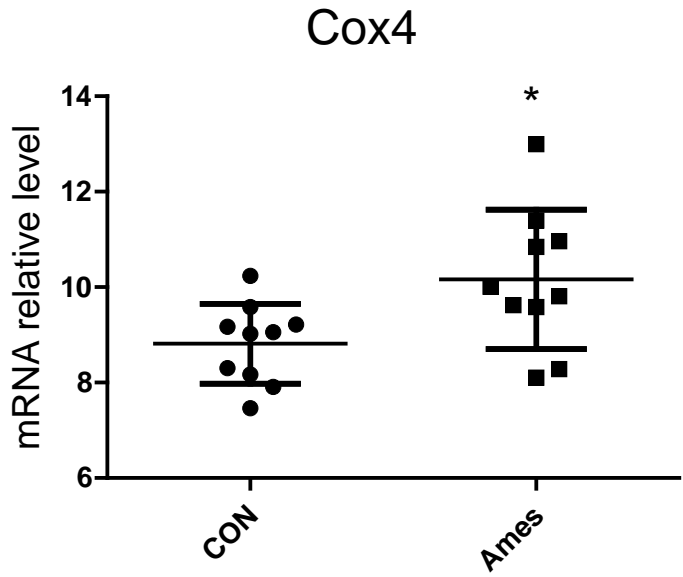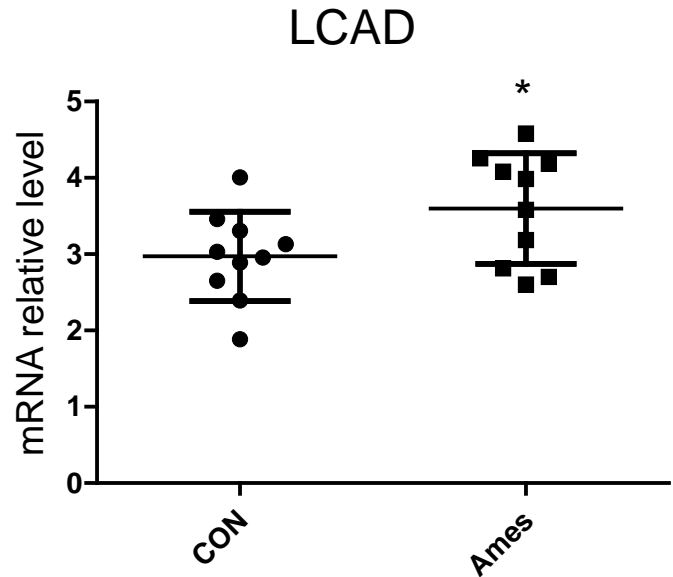

Supplement: 10.1074_C117.794982_jbc.C117.794982-1.pdf [file 10.1074_C117.794982_jbc.C117.794982-1.pdf]
